# Supplementary material for: Occurrence, residency, and habitat characterization of leopard seals in Chile
Source: Frontiers journal article supplement (doi:10.3389/fevo.2024.1448098), 2024-10-31
Supplement: Table_2.xlsx [file Table_2.xlsx]

## Sheet: Caption
Supplementary Table 2. Compiled existing and new records of leopard seals in Chile from 1927 to 2023. “Seal ID” is a unique consecutive number for each individual seal. “Repeated Animal” indicates if the sighting is of a previously identified individual seal, where 'Y' refers to individuals reported in different sources or recognized by the authors using existing catalogs, and 'N' represents sigh…

## Sheet: Table
Seal ID	Repeat Animal	Catalog ID	Date	Field GPS/Est. from Loc.	Latitude (S)	Longitude (W)	Age Class	Sex	Locality	Region	Substrate	Animal Status	Standard Length (cm)	Notes	Original Source*	Reviewed*
Historical Records
1	N	-	1927	Field GPS	-54.6667	-69.4667	-	-	Almirantazgo Sound	XII	Ice	-	-	-	Pluschow (1927)**	Aguayo-Lobo et al. (2011)
2	N	-	1944	Est. from Loc.	-36.75	-73.1667	-	-	San Vicente	VIII	-	-	-	Occasional presence	Oliver-Schneider (1946)	Aguayo-Lobo et al. (2011)
3	N	-	1947	Est. from Loc.	-36.7	-73.0833	-	-	Talcahuano	VIII	-	-	-	Skin remains	Housse (1953)	Aguayo-Lobo et al. (2011)
4	N	-	1967	Est. from Loc.	-33.6167	-78.8167	Juvenile	-	Robinson Crusoe Island, Juan Fernandez	V	-	-	-	Skin remains	Torres & Aguayo-Lobo (1971)	Aguayo-Lobo et al. (2011)
5	N	-	1944-1947	Est. from Loc.	-55	-68.8333	-	-	Beagle Channel	XII	-	-	-	Occasional presence	Yañez (1948)	Aguayo-Lobo et al. (2011)
6	N	-	Feb-71	Field GPS	-54.6667	-69.3333	Adult	F	Parry Fjord, Almirantazgo Sound	XII	Ice	-	302	Hindflipper: 45 cm; Foreflipper: 55 cm; Stomach contained pieces of fish, Magellenic penguin, and a lot of nematode parasites; Animal molting	Markham (1971)	Aguayo-Lobo et al. (2011)
7	N	-	Feb-71	Field GPS	-54.6667	-69.3333	-	-	Parry Fjord, Almirantazgo Sound	XII	-	-	-	Animal molting	Markham (1971)	Aguayo-Lobo et al. (2011)
8	N	-	Feb-71	Field GPS	-54.6667	-69.3333	-	-	Parry Fjord, Almirantazgo Sound	XII	-	-	-	Animal molting	Markham (1971)	Aguayo-Lobo et al. (2011)
9	N	-	Feb-71	Field GPS	-54.6667	-69.3333	-	-	Parry Fjord, Almirantazgo Sound	XII	-	-	-	Animal molting	Markham (1971)	Aguayo-Lobo et al. (2011)
10	N	-	Feb-78	Field GPS	-54.6333	-69.3333	-	-	Parry Fjord, Almirantazgo Sound	XII	-	-	-	-	Sielfeld (1978)	Aguayo-Lobo et al. (2011)
11	N	-	Feb-78	Est. from Loc.	-51.883	-72.803	-	-	Almirante Montt Gulf	XII	-	-	-	Skull in museum	Sielfeld (1978)	Aguayo-Lobo et al. (2011)
12	N	-	1978-08-09	Field GPS	-30.1667	-71.4333	-	-	Guanaquero Beach	IV	-	-	-	-	Scheffer (1978)	Aguayo-Lobo et al. (2011)
13	N	-	Feb-79	Est. from Loc.	-46.6667	-73.8667	-	-	San Rafael Lagoon	XI	Ice	Good	-	-	Torres et al. (1979)	Aguayo-Lobo et al. (2011)
14	N	-	Feb-79	Est. from Loc.	-46.6667	-73.8667	-	-	San Rafael Lagoon	XI	Ice	Good	-	-	Torres et al. (1979)	Aguayo-Lobo et al. (2011)
15	N	-	Feb-79	Est. from Loc.	-46.6667	-73.8667	-	-	San Rafael Lagoon	XI	Ice	Good	-	-	Torres et al. (1979)	Aguayo-Lobo et al. (2011)
16	N	-	1994-10-12	Est. from Loc.	-33.7333	-71.6833	Juvenile	-	El Yali Beach	V	-	Dead	-	Skull collected; Animal had multiple injures	Zuniga & Brito (1997)	Aguayo-Lobo et al. (2011)
17	N	-	1995-07-27	Est. from Loc.	-33.6167	-71.6833	Juvenile	F	Santo Domingo Beach	V	-	Injured	199	Animal had multiple injuries; Rehabilitated and released	Zuniga & Brito (1997)	Aguayo-Lobo et al. (2011)
18	N	-	1995-09-01	Est. from Loc.	-36.6333	-72.9333	Juvenile	-	Lirquen	VIII	-	-	-	-	Aguayo-Lobo et al. (2011)	Aguayo-Lobo et al. (2011)
19	N	-	1996-07-31	Est. from Loc.	-33	-71.55	Juvenile	F	Viña del Mar	V	-	Sick/Dead	205	Review does not clearly establish if animal was sick or dead	Aguayo-Lobo et al. (2011)	Aguayo-Lobo et al. (2011)
20	N	-	2000-06-22	Est. from Loc.	-33.0167	-71.55	Juvenile	-	Viña del Mar	V	-	Good	~200	-	Aguayo-Lobo et al. (2011)	Aguayo-Lobo et al. (2011)
21	N	-	2000-10-12	Est. from Loc.	-33.35	-71.65	Juvenile	-	Los Tubos Beach	V	Land	Good	~200	Hauled out on beach	Aguayo-Lobo et al. (2011)	Aguayo-Lobo et al. (2011)
22	N	-	2001-10-09	Est. from Loc.	-33.4167	-71.7	Adult	M	El Quisco Beach	V	-	Injured	240	-	Aguayo-Lobo et al. (2011)	Aguayo-Lobo et al. (2011)
23	N	-	2002-07-18	Est. from Loc.	-34.4167	-72.0333	Juvenile	F	Pichilemu Beach	VIII	-	-	-	-	Aguayo-Lobo et al. (2011)	Aguayo-Lobo et al. (2011)
24	N	-	2002-07-25	Est. from Loc.	-34.1667	-71.8	Juvenile	F	Topocalma	V	-	-	-	Caught and tagged with rototags (3011-3021)	Aguayo-Lobo et al. (2011)	Aguayo-Lobo et al. (2011)
24	Y	-	2002-07-27	Est. from Loc.	-33.35	-71.6333	Juvenile	F	Algarrobo Beach	V	-	-	-	Same as 24; Caught and tagged with rototag (3011-3021)	Aguayo-Lobo et al. (2011)	Aguayo-Lobo et al. (2011)
25	N	-	2002-08-04	Est. from Loc.	-27.1167	-109.433	Juvenile	M	Eastern Island	V	-	-	205	Length: 2.05 m; Hucke-Gaete et al. (2014) said it was 160 cm and weight 90 kg	Alejandro Bugueño & El Mercurio News Paper (2002)**	Aguayo-Lobo et al. (2011)
26	N	-	2002-10-12	Est. from Loc.	-33.35	-71.65	Juvenile	F	Los Tubos Beach	V	-	Good	200	-	Aguayo-Lobo et al. (2011)	Aguayo-Lobo et al. (2011)
27	N	-	2003-01-17	Field GPS	-54.6667	-69.4667	Adult	M	SW Parry Fjord, Almirantazgo Sound	XII	Ice	Good	-	-	Aguayo-Lobo et al. (2011)	Aguayo-Lobo et al. (2011)
28	N	-	2003-01-17	Field GPS	-54.6667	-69.4667	Adult	F	SW Parry Fjord, Almirantazgo Sound	XII	Ice	Good	-	-	Aguayo-Lobo et al. (2011)	Aguayo-Lobo et al. (2011)
29	N	-	2003-01-17	Field GPS	-54.6667	-69.4667	Adult	F	SW Parry Fjord, Almirantazgo Sound	XII	Ice	Good	-	-	Aguayo-Lobo et al. (2011)	Aguayo-Lobo et al. (2011)
30	N	-	2003-01-17	Field GPS	-54.6667	-69.4667	Juvenile	M	SW Parry Fjord, Almirantazgo Sound	XII	Ice	Good	-	-	Aguayo-Lobo et al. (2011)	Aguayo-Lobo et al. (2011)
31	N	-	2003-01-17	Field GPS	-54.6667	-69.4667	Juvenile	M	SW Parry Fjord, Almirantazgo Sound	XII	Ice	Good	-	-	Aguayo-Lobo et al. (2011)	Aguayo-Lobo et al. (2011)
32	N	-	2003-01-17	Field GPS	-54.6667	-69.4667	Juvenile	M	SW Parry Fjord, Almirantazgo Sound	XII	Ice	Good	-	-	Aguayo-Lobo et al. (2011)	Aguayo-Lobo et al. (2011)
33	N	-	2003-01-17	Field GPS	-54.6667	-69.4667	Juvenile	M	SW Parry Fjord, Almirantazgo Sound	XII	Ice	Good	-	-	Aguayo-Lobo et al. (2011)	Aguayo-Lobo et al. (2011)
34	N	-	2003-01-17	Field GPS	-54.6667	-69.4667	Juvenile	-	SW Parry Fjord, Almirantazgo Sound	XII	Ice	Good	-	-	Aguayo-Lobo et al. (2011)	Aguayo-Lobo et al. (2011)
35	N	-	2003-01-17	Field GPS	-54.6667	-69.4667	Juvenile	-	SW Parry Fjord, Almirantazgo Sound	XII	Ice	Good	-	-	Aguayo-Lobo et al. (2011)	Aguayo-Lobo et al. (2011)
36	N	-	2003-08-01	Field GPS	-54.3	-70.6667	Adult	-	Keat Sound, D'Agostini Sound	XII	Ice	Good	-	-	Aguayo-Lobo et al. (2011)	Aguayo-Lobo et al. (2011)
37	N	-	2003-08-01	Field GPS	-54.5	-70.4167	Juvenile	-	D'Agostini Sound	XII	Ice	Good	-	-	Aguayo-Lobo et al. (2011)	Aguayo-Lobo et al. (2011)
38	N	-	2003-11-28	Field GPS	-54.6833	-69.4833	Adult	F	SW Parry Fjord, Almirantazgo Sound	XII	Ice	Good	-	-	Aguayo-Lobo et al. (2011)	Aguayo-Lobo et al. (2011)
39	N	-	2003-11-28	Field GPS	-54.6833	-69.4833	Adult	F	SW Parry Fjord, Almirantazgo Sound	XII	Ice	Good	-	-	Aguayo-Lobo et al. (2011)	Aguayo-Lobo et al. (2011)
40	N	-	2003-11-28	Field GPS	-54.6833	-69.4833	Adult	-	SW Parry Fjord, Almirantazgo Sound	XII	Ice	Good	-	-	Aguayo-Lobo et al. (2011)	Aguayo-Lobo et al. (2011)
41	N	-	2003-11-28	Field GPS	-54.6833	-69.4833	Adult	-	SW Parry Fjord, Almirantazgo Sound	XII	Ice	Good	-	-	Aguayo-Lobo et al. (2011)	Aguayo-Lobo et al. (2011)
42	N	-	2003-11-28	Field GPS	-54.6667	-69.4333	Juvenile/pup	-	SW Parry Fjord, Almirantazgo Sound	XII	Ice	Good	~180 (visual estimate)	Acevedo et al. (2017) and van der Linde et al. (2022) described this animal as possible pup in contrast to original description as juvenile by Aguayo-Lobo et al. (2011)	Aguayo-Lobo et al. (2011)	Aguayo-Lobo et al. (2011), Acevedo et al. (2017), van der Linde et al. (2022)
43	N	-	2004-02-07	Field GPS	-54.6	-69.3667	Juvenile	F	SW Parry Fjord, Almirantazgo Sound	XII	Ice	Good	-	-	Aguayo-Lobo et al. (2011)	Aguayo-Lobo et al. (2011)
44	N	-	2004-02-07	Field GPS	-54.6	-69.3333	Juvenile	-	SW Parry Fjord, Almirantazgo Sound	XII	Ice	Good	-	-	Aguayo-Lobo et al. (2011)	Aguayo-Lobo et al. (2011)
45	N	-	2004-02-07	Field GPS	-54.6667	-69.4333	Juvenile	F	SW Parry Fjord, Almirantazgo Sound	XII	Ice	Good	-	-	Aguayo-Lobo et al. (2011)	Aguayo-Lobo et al. (2011)
46	N	-	2004-02-07	Field GPS	-54.6667	-69.4333	Juvenile	-	SW Parry Fjord, Almirantazgo Sound	XII	Ice	Good	-	-	Aguayo-Lobo et al. (2011)	Aguayo-Lobo et al. (2011)
47	N	-	2004-02-07	Field GPS	-54.65	-69.4167	Juvenile	-	SW Parry Fjord, Almirantazgo Sound	XII	Ice	Good	-	-	Aguayo-Lobo et al. (2011)	Aguayo-Lobo et al. (2011)
48	N	-	2004-11-05	Field GPS	-54.6667	-69.4667	Adult	-	SW Parry Fjord, Almirantazgo Sound	XII	Ice	Good	-	-	Aguayo-Lobo et al. (2011)	Aguayo-Lobo et al. (2011)
49	N	-	2004-11-05	Field GPS	-54.6667	-69.4667	Adult	-	SW Parry Fjord, Almirantazgo Sound	XII	Ice	Good	-	-	Aguayo-Lobo et al. (2011)	Aguayo-Lobo et al. (2011)
50	N	-	2004-11-05	Field GPS	-54.6667	-69.4667	Adult	-	SW Parry Fjord, Almirantazgo Sound	XII	Ice	Good	-	-	Aguayo-Lobo et al. (2011)	Aguayo-Lobo et al. (2011)
51	N	-	2004-11-05	Field GPS	-54.6667	-69.4667	Adult	-	SW Parry Fjord, Almirantazgo Sound	XII	Ice	Good	-	-	Aguayo-Lobo et al. (2011)	Aguayo-Lobo et al. (2011)
52	N	-	2004-11-05	Field GPS	-54.6833	-69.35	Adult	F	SE Parry Fjord, Almirantazgo Sound	XII	Ice	Good	-	-	Aguayo-Lobo et al. (2011)	Aguayo-Lobo et al. (2011)
53	N	-	2005-01-19	Field GPS	-54.6667	-69.3667	Adult	F	SW Parry Fjord, Almirantazgo Sound	XII	Ice	Good	-	-	Aguayo-Lobo et al. (2011)	Aguayo-Lobo et al. (2011)
54	N	-	2005-01-19	Field GPS	-54.6667	-69.3667	Adult	-	SW Parry Fjord, Almirantazgo Sound	XII	Ice	Good	-	-	Aguayo-Lobo et al. (2011)	Aguayo-Lobo et al. (2011)
55	N	-	2005-01-19	Field GPS	-54.6667	-69.3667	Adult	-	SW Parry Fjord, Almirantazgo Sound	XII	Ice	Good	-	-	Aguayo-Lobo et al. (2011)	Aguayo-Lobo et al. (2011)
56	N	-	2005-01-19	Field GPS	-54.6667	-69.3667	Adult	-	SW Parry Fjord, Almirantazgo Sound	XII	Ice	Good	-	-	Aguayo-Lobo et al. (2011)	Aguayo-Lobo et al. (2011)
57	N	-	2005-01-19	Field GPS	-54.6667	-69.3667	Juvenile	-	SW Parry Fjord, Almirantazgo Sound	XII	Ice	Good	-	-	Aguayo-Lobo et al. (2011)	Aguayo-Lobo et al. (2011)
58	N	-	2005-01-19	Field GPS	-54.6667	-69.3667	Juvenile	-	SW Parry Fjord, Almirantazgo Sound	XII	Ice	Good	-	-	Aguayo-Lobo et al. (2011)	Aguayo-Lobo et al. (2011)
59	N	-	2005-01-19	Field GPS	-54.6667	-69.3667	Juvenile	-	SW Parry Fjord, Almirantazgo Sound	XII	Ice	Good	-	-	Aguayo-Lobo et al. (2011)	Aguayo-Lobo et al. (2011)
60	N	-	2005-03-01	Field GPS	-53.8333	-72.4833	-	-	Helado Sound, Barbara Channel	XII	Ice	Good	-	-	Aguayo-Lobo et al. (2011)	Aguayo-Lobo et al. (2011)
61	N	-	2005-03-01	Field GPS	-53.8333	-72.4833	-	-	Helado Sound, Barbara Channel	XII	Ice	Good	-	-	Aguayo-Lobo et al. (2011)	Aguayo-Lobo et al. (2011)
62	N	-	2005-04-19	Field GPS	-54.6667	-69.35	Adult	M	SW Parry Fjord, Almirantazgo Sound	XII	Ice	Good	-	-	Aguayo-Lobo et al. (2011)	Aguayo-Lobo et al. (2011)
63	N	-	2005-04-19	Field GPS	-54.6667	-69.35	Adult	M	SW Parry Fjord, Almirantazgo Sound	XII	Ice	Good	-	-	Aguayo-Lobo et al. (2011)	Aguayo-Lobo et al. (2011)
64	N	-	2005-04-19	Field GPS	-54.6667	-69.35	Adult	M	SW Parry Fjord, Almirantazgo Sound	XII	Ice	Good	-	-	Aguayo-Lobo et al. (2011)	Aguayo-Lobo et al. (2011)
65	N	-	2005-04-19	Field GPS	-54.6667	-69.35	Adult	-	SW Parry Fjord, Almirantazgo Sound	XII	Ice	Good	-	-	Aguayo-Lobo et al. (2011)	Aguayo-Lobo et al. (2011)
66	N	-	2005-04-19	Field GPS	-54.6667	-69.35	Adult	-	SW Parry Fjord, Almirantazgo Sound	XII	Ice	Good	-	-	Aguayo-Lobo et al. (2011)	Aguayo-Lobo et al. (2011)
67	N	-	2005-04-19	Field GPS	-54.6667	-69.45	Juvenile	M	SW Parry Fjord, Almirantazgo Sound	XII	Ice	Good	-	-	Aguayo-Lobo et al. (2011)	Aguayo-Lobo et al. (2011)
68	N	-	2005-10-31	Field GPS	-54.6667	-69.4333	Juvenile	M	SW Parry Fjord, Almirantazgo Sound	XII	Ice	Good	-	-	Aguayo-Lobo et al. (2011)	Aguayo-Lobo et al. (2011)
69	N	-	2005-10-31	Field GPS	-54.6667	-69.4333	Juvenile	M	SW Parry Fjord, Almirantazgo Sound	XII	Ice	Good	-	-	Aguayo-Lobo et al. (2011)	Aguayo-Lobo et al. (2011)
70	N	-	2005-10-31	Field GPS	-54.7	-69.3333	Adult	M	SW Parry Fjord, Almirantazgo Sound	XII	Ice	Good	-	-	Aguayo-Lobo et al. (2011)	Aguayo-Lobo et al. (2011)
71	N	-	2005-11-01	Field GPS	-53.7167	-72.5833	-	-	Ballena Sound, SW Santa Ines Island	XII	Ice	Good	-	-	Aguayo-Lobo et al. (2011)	Aguayo-Lobo et al. (2011)
72	N	-	2006-01-27	Field GPS	-54.8667	-69.75	Adult	M	Pia Sound, Beagle Channel	XII	Ice	Good	-	-	Aguayo-Lobo et al. (2011)	Aguayo-Lobo et al. (2011)
73	N	-	2006-02-16	Field GPS	-54.7667	-67.4833	Adult	F	Navarino Island, Beagle Channel	XII	Water/Land	-	-	-	Aguayo-Lobo et al. (2011)	Aguayo-Lobo et al. (2011)
74	N	-	2006-03-13	Field GPS	-54.5833	-69.3333	Juvenile	F	SW Parry Fjord, Almirantazgo Sound	XII	Ice	Good	-	-	Aguayo-Lobo et al. (2011)	Aguayo-Lobo et al. (2011)
75	N	-	2006-09-01	Field GPS	-53.7167	-72.5667	-	-	Ballena Sound, SW Santa Ines Island	XII	Ice	Good	-	-	Aguayo-Lobo et al. (2011)	Aguayo-Lobo et al. (2011)
76	N	-	2006-09-02	Field GPS	-53.7167	-72.5667	-	-	Ballena Sound, SW Santa Ines Island	XII	Ice	Good	-	-	Aguayo-Lobo et al. (2011)	Aguayo-Lobo et al. (2011)
77	N	-	2006-12-16	Field GPS	-54.6667	-69.4333	Adult	-	SW Parry Fjord, Almirantazgo Sound	XII	Ice	Good	-	-	Aguayo-Lobo et al. (2011)	Aguayo-Lobo et al. (2011)
78	N	-	2006-12-16	Field GPS	-54.7	-69.3333	Adult	-	SE Parry Fjord, Almirantazgo Sound	XII	Ice	Good	-	-	Aguayo-Lobo et al. (2011)	Aguayo-Lobo et al. (2011)
79	N	-	2007-01-01	Field GPS	-53.7167	-72.5833	-	-	Ballena Sound, SW Santa Ines Island	XII	Ice	Good	-	-	Aguayo-Lobo et al. (2011)	Aguayo-Lobo et al. (2011)
80	N	-	2007-01-01	Field GPS	-53.7167	-72.5833	-	-	Ballena Sound, SW Santa Ines Island	XII	Ice	Good	-	-	Aguayo-Lobo et al. (2011)	Aguayo-Lobo et al. (2011)
81	N	-	2007-07-09	Field GPS	-33.1	-71.6667	Juvenile	-	Verde Lagoon	V	-	-	-	-	Aguayo-Lobo et al. (2011)	Aguayo-Lobo et al. (2011)
82	N	-	2007-08-03	Field GPS	-32.5833	-71.4667	Juvenile	M	Cachagua	V	Land	Emaciated	240	Rehabilited and released	Vargas & Carrasco (2007)	Aguayo-Lobo et al. (2011)
83	N	-	2007-09-01	Field GPS	-40.9418	-73.8634	-	-	San Pedro Bay, Region de Los Lagos	X	-	-	-	-	Cursach et al. (2011)	This study
84	N	-	2007-09-06	Field GPS	-29.95	-71.3167	Juvenile	M	Coquimbo	IV	-	Dead	-	Found in poor condition, then died	Aguayo-Lobo et al. (2011)	Aguayo-Lobo et al. (2011)
85	N	-	2007-09-12	Field GPS	-54.65	-69.4333	Adult	F	SW Parry Fjord, Almirantazgo Sound	XII	Ice	Good	-	-	Aguayo-Lobo et al. (2011)	Aguayo-Lobo et al. (2011)
86	N	-	2007-09-12	Field GPS	-54.65	-69.4333	Adult	F	SW Parry Fjord, Almirantazgo Sound	XII	Ice	Good	-	-	Aguayo-Lobo et al. (2011)	Aguayo-Lobo et al. (2011)
87	N	-	2007-11-27	Field GPS	-54.65	-69.4	Adult	F	SW Parry Fjord, Almirantazgo Sound	XII	Ice	Good	-	-	Aguayo-Lobo et al. (2011)	Aguayo-Lobo et al. (2011)
88	N	-	2007-11-27	Field GPS	-54.65	-69.4	Adult	F	SW Parry Fjord, Almirantazgo Sound	XII	Ice	Good	-	-	Aguayo-Lobo et al. (2011)	Aguayo-Lobo et al. (2011)
89	N	-	2007-12-06	Field GPS	-36.75	-73.1333	Juvenile	F	Lenga Inlet, Corral Bay	VIII	-	-	-	Animal molting	Diario Cronica (2007)**	Aguayo-Lobo et al. (2011)
90	N	-	2008-04-01	Field GPS	-54.65	-69.45	Juvenile/Adult	-	SW Parry Fjord, Almirantazgo Sound	XII	Ice	Good	-	-	Aguayo-Lobo et al. (2011)	Aguayo-Lobo et al. (2011)
91	N	-	2008-04-01	Field GPS	-54.65	-69.45	Juvenile/Adult	-	SW Parry Fjord, Almirantazgo Sound	XII	Ice	Good	-	-	Aguayo-Lobo et al. (2011)	Aguayo-Lobo et al. (2011)
92	N	-	2008-04-01	Field GPS	-54.65	-69.45	Juvenile/Adult	-	SW Parry Fjord, Almirantazgo Sound	XII	Ice	Good	-	-	Aguayo-Lobo et al. (2011)	Aguayo-Lobo et al. (2011)
93	N	-	2008-04-01	Field GPS	-54.65	-69.45	Juvenile/Adult	-	SW Parry Fjord, Almirantazgo Sound	XII	Ice	Good	-	-	Aguayo-Lobo et al. (2011)	Aguayo-Lobo et al. (2011)
94	N	-	2008-05-01	Field GPS	-36.75	-73.1333	Juvenile	-	Lenga Inlet, Corral Bay	VIII	-	-	-	-	Aguayo-Lobo et al. (2011)	Aguayo-Lobo et al. (2011)
95	N	-	2008-08-01	Field GPS	-54.4833	-71.0667	Juvenile	-	Chico Sound, Magdalena Channel	XII	Ice	Good	-	-	Aguayo-Lobo et al. (2011)	Aguayo-Lobo et al. (2011)
96	N	-	2008-08-01	Field GPS	-54.4833	-71.0667	Juvenile	-	Chico Sound, Magdalena Channel	XII	Ice	Good	-	-	Aguayo-Lobo et al. (2011)	Aguayo-Lobo et al. (2011)
97	N	-	2008-08-16	Field GPS	-39.9167	-73.4	Juvenile	F	San Juan River, Corral Bay	IX	-	-	-	-	Aguayo-Lobo et al. (2011)	Aguayo-Lobo et al. (2011)
98	N	-	2008-11-04	Field GPS	-39.7	-73.35	Juvenile	-	Calbuco Beach	IX	-	-	-	-	Aguayo-Lobo et al. (2011)	Aguayo-Lobo et al. (2011)
99	N	-	2008-12-01	Field GPS	-54.7667	-69.6167	Juvenile	-	Pia Sound, Beagle Channel	XII	Ice	Good	-	-	Aguayo-Lobo et al. (2011)	Aguayo-Lobo et al. (2011)
100	N	-	2008-12-01	Field GPS	-54.7667	-69.6167	Juvenile	-	Pia Sound, Beagle Channel	XII	Ice	Good	-	-	Aguayo-Lobo et al. (2011)	Aguayo-Lobo et al. (2011)
101	N	-	2008-12-01	Field GPS	-54.7667	-69.6167	Juvenile	-	Pia Sound, Beagle Channel	XII	Ice	Good	-	-	Aguayo-Lobo et al. (2011)	Aguayo-Lobo et al. (2011)
102	N	-	2008-12-01	Field GPS	-55.1	-69.9167	Juvenile	-	SW branch of Beagle Channel	XII	Ice	Good	-	-	Aguayo-Lobo et al. (2011)	Aguayo-Lobo et al. (2011)
103	N	-	2008-12-01	Field GPS	-55.1	-69.9167	Juvenile	-	SW branch of Beagle Channel	XII	Ice	Good	-	-	Aguayo-Lobo et al. (2011)	Aguayo-Lobo et al. (2011)
104	N	-	2009-03-01	Field GPS	-54.45	-69.6167	Juvenile	-	Ainsworth Bay, Almiratazgo Sound	XII	Ice	Good	-	-	Aguayo-Lobo et al. (2011)	Aguayo-Lobo et al. (2011)
105	N	-	2009-03-01	Field GPS	-54.45	-69.6167	Adult	-	Ainsworth Bay, Almiratazgo Sound	XII	Ice	Good	-	-	Aguayo-Lobo et al. (2011)	Aguayo-Lobo et al. (2011)
106	N	-	2009-05-14	Est. from Loc.	-42.38	-72.4	Adult	-	Huinay, Comau Fjord	X	Land	Good	-	Hauled out on dock	Hausserman et al. (2012)	This study
107	N	-	2009-08-01	Est. from Loc.	-33.35	-71.65	Juvenile	-	Algarrobo Beach	V	-	Emaciated	-	-	Aguayo-Lobo et al. (2011)	Aguayo-Lobo et al. (2011)
108	N	-	2009-08-12	Est. from Loc.	-33.7167	-71.6667	Juvenile	-	Santo Domingo Beach	V	-	Good	-	-	Aguayo-Lobo et al. (2011)	Aguayo-Lobo et al. (2011)
109	N	-	2009-11-28	Field GPS	-54.55	-70.1333	Adult	M	Hyatt Sound, D'Agostini Sound	XII	Ice	Good	-	-	Aguayo-Lobo et al. (2011)	Aguayo-Lobo et al. (2011)
110	N	-	2009-11-28	Field GPS	-54.55	-70.1333	Adult	F	Hyatt Sound, D'Agostini Sound	XII	Ice	Good	-	-	Aguayo-Lobo et al. (2011)	Aguayo-Lobo et al. (2011)
111	N	-	2009-11-28	Field GPS	-54.55	-70.1333	Adult	-	Hyatt Sound, D'Agostini Sound	XII	Ice	Good	-	-	Aguayo-Lobo et al. (2011)	Aguayo-Lobo et al. (2011)
112	N	-	2009-11-28	Field GPS	-54.55	-70.1333	Adult	-	Hyatt Sound, D'Agostini Sound	XII	Ice	Good	-	-	Aguayo-Lobo et al. (2011)	Aguayo-Lobo et al. (2011)
113	N	-	2009-11-30	Est. from Loc.	-29.2167	-70.1333	Juvenile	-	La Bandera Beach	IV	-	-	-	-	Aguayo-Lobo et al. (2011)	Aguayo-Lobo et al. (2011)
114	N	-	2010-01-01	Field GPS	-54.55	-70.1333	Adult	-	Hyatt Sound, D'Agostini Sound	XII	Ice	Good	-	-	Aguayo-Lobo et al. (2011)	Aguayo-Lobo et al. (2011)
115	N	-	2010-01-01	Field GPS	-54.55	-70.1333	Juvenile	-	Hyatt Sound, D'Agostini Sound	XII	Ice	Good	-	-	Aguayo-Lobo et al. (2011)	Aguayo-Lobo et al. (2011)
116	N	-	2010-01-01	Field GPS	-54.55	-70.1333	Juvenile	-	Hyatt Sound, D'Agostini Sound	XII	Ice	Good	-	-	Aguayo-Lobo et al. (2011)	Aguayo-Lobo et al. (2011)
117	N	-	2010-08-05	Est. from Loc.		-71.65	Juvenile	M	Mirasol Beach, Algarrobo	V	-	Injured	210	Multiple injuries on body; Head with hematomas and effusions in right eye	Aguayo-Lobo et al. (2011)	Aguayo-Lobo et al. (2011)
118	N	-	Winter 2011	Est. from Loc.	-27.1503	-109.436	Juvenile	-	Hanga Roa Bay	V	Land	Good	-	Was maintained in a pool a few days and then released	Hucke-Gaete et al. (2014)	Stewart et al. (2020)
119	N	-	2011-09-28	Est. from Loc.	-42.38	-72.4	-	-	Huinay, Comau Fjord	X	Water	-	-	Swimming near dock; Likely 144	Haeusserman et al. (2012)	This study
120	N	-	2012-01-05	Field GPS	-53.6833	-72.6167	Adult	M	Ballena Sound	XII	Land	Good	300	Hauled out on rocky platform close to water	Acevedo & Martinez (2013)	This study
120	Y	-	2012-02-25	Field GPS	-53.6833	-72.6167	Adult	M	Ballena Sound	XII	Water/Land	Good	300	Swimming between ice floe and glacier; An hour later, animal was resting on rocky platform	Acevedo & Martinez (2013)	This study
120	Y	-	2012-04-08	Field GPS	-53.6833	-72.6167	Adult	M	Ballena Sound	XII	Water	Good	300	Swimming between ice floe and glacier	Acevedo & Martinez (2013)	This study
120	Y	-	2012-05-01	Field GPS	-53.6833	-72.6167	Adult	M	Ballena Sound	XII	Land	Good	300	Hauled out on rocky platform close to water	Acevedo & Martinez (2013)	This study
120	Y	-	2012-05-22	Field GPS	-53.6833	-72.6167	Adult	M	Ballena Sound	XII	Water	Good	300	Swimming near rocky platform	Acevedo & Martinez (2013)	This study
120	Y	-	2012-05-27	Field GPS	-53.6833	-72.6167	Adult	M	Ballena Sound	XII	Water	Good	300	Swimming near a sill of 2m in Ballena Sound	Acevedo & Martinez (2013)	This study
121	N	-	2012-12-02	Est. from Loc.	-54.6794	-69.5111	Adult	F	Parry Fjord, Almirantazgo Sound	XII	Ice	Good	-	Found near dead pup; Likely mother of 122	Acevedo et al. (2017)	This study
122	N	-	2012-12-02	Est. from Loc.	-54.6794	-69.5111	Pup	-	Parry Fjord, Almirantazgo Sound	XII	Ice	Dead	-	Likely born days earlier; Likely pup of 121	Acevedo et al. (2017)	van der Linde et al. (2022)
123	N	LSR02	2013-10-21	Est. from Loc.	-46.6667	-73.8667	Adult	F	San Rafael Lagoon	XI	Ice	Good	-	Identified with SR Catalog; Mother of 124	van der Linde et al. (2022)	This study
124	N	-	2013-10-21	Est. from Loc.	-46.6667	-73.8667	Pup	-	San Rafael Lagoon	XI	Ice	Good	-	Placenta still attached; Pup of 123	van der Linde et al. (2022)	This study
123	Y	LSR02	2013-10-25	Est. from Loc.	-46.6667	-73.8667	Adult	F	San Rafael Lagoon	XI	Ice	Good	-	Identified with SR Catalog; Mother of 124	Boop (2014)**	Acevedo et al. (2017), van der Linde et al. (2022)
124	Y	-	2013-10-25	Est. from Loc.	-46.6667	-73.8667	Pup	-	San Rafael Lagoon	XI	Ice	Good	-	Placenta still attached; Pup of 123	Boop (2014)**	Acevedo et al. (2017), van der Linde et al. (2022)
125	N	-	2015-10-06	Field GPS	-54.6789	-69.5111	Adult	F	Parry Fjord, Almirantazgo Sound	XII	Ice	Good	-	Found near dead pup; Likely mother of 126	Acevedo et al. (2017)	van der Linde et al. (2022)
126	N	-	2015-10-06	Field GPS	-54.6792	-69.5111	Pup	-	Parry Fjord, Almirantazgo Sound	XII	Ice	Dead	-	Likely born days earlier; Likely pup of 125	Acevedo et al. (2017)	van der Linde et al. (2022)
127	N	-	2015-10-13	Field GPS	-54.6794	-69.5111	-	-	Parry Fjord, Almirantazgo Sound	XII	Water	-	-	-	Acevedo et al. (2017)	This study
128	N	-	2016-11-08	Est. from Loc.	-46.6667	-73.8667	Adult	F	San Rafael Lagoon	XI	Land	Good	-	Mother of 129	van der Linde et al. (2022)	This study
129	N	-	2016-11-08	Est. from Loc.	-46.6667	-73.8667	Pup	-	San Rafael Lagoon	XI	Land	Good	-	Pup of 128	van der Linde et al. (2022)	This study
130	N	-	2017-08-01	Est. from Loc.	-27.17	-109.4	Juvenile	-	27 km off Easter Island	V	Water	Poor	-	We added GPS location of individual observed in Hanga Roay	Stewart et al. (2020)	This study
123	Y	LSR02	2017-10-28	Est. from Loc.	-46.6667	-73.8667	Adult	F	San Rafael Lagoon	XI	Ice	Good	-	Mother of 131	van der Linde et al. (2022)	This study
131	N	-	2017-10-28	Est. from Loc.	-46.6667	-73.8667	Pup	-	San Rafael Lagoon	XI	Ice	Dead	-	Pup of 123	van der Linde et al. (2022)	This study
123	Y	LSR02	2017-11-01	Est. from Loc.	-46.6667	-73.8667	Adult	F	San Rafael Lagoon	XI	Ice	Good	-	Mother of 131	van der Linde et al. (2022)	This study
131	Y	-	2017-11-01	Est. from Loc.	-46.6667	-73.8667	Pup	-	San Rafael Lagoon	XI	Ice	Dead	-	Pup of 123	van der Linde et al. (2022)	This study
132	N	TF01	2017-11-04	Est. from Loc.	-54.6792	-69.5111	Adult	F	Parry Fjord, Almirantazgo Sound	XII	Ice	Good	-	Identified from TF Catalog; Mother of 133	van der Linde et al. (2022)	This study
133	N	-	2017-11-04	Est. from Loc.	-54.6794	-69.5111	Pup	-	Parry Fjord, Almirantazgo Sound	XII	Ice	Good	-	Pup of 132	van der Linde et al. (2022)	This study
134	N	-	2018-10-04	Est. from Loc.	-27.17	-109.4	Juvenile	M	Hanga Roa Bay (south east coast)	V	Land	Good	-	-	Stewart et al. (2020)	This study
135	N	LSR01	2021-10-19	Est. from Loc.	-46.6667	-73.8667	Adult	F	San Rafael Lagoon	XI	Ice	Good	-	Identified with SR Catalog; Mother of 136	van der Linde et al. (2022)	This study
136	N	-	2021-10-19	Est. from Loc.	-46.6667	-73.8667	Pup	-	San Rafael Lagoon	XI	Ice	Dead	-	Pup of 135	van der Linde et al. (2022)	This study
New Records
108	Y	-	2009-08-12	Est. from Loc.	-33.326	-71.65	Juvenile	-	Algarrobo Beach	V	-	-	-	Age class obtained from Aguayo-Lobo et al. (2011)	SERNAPESCA	Aguayo-Lobo et al. (2011)
108	Y	-	2009-08-31	Est. from Loc.	-33.606	-71.627	Juvenile	-	Ojos de Llo lleo Beach	V	-	-	-	Age class obtained from Aguayo-Lobo et al. (2011)	SERNAPESCA	This study
108	Y	-	2009-09-01	Est. from Loc.	-33.606	-71.627	Juvenile	-	Ojos de Llo lleo Beach	V	-	-	-	Age class obtained from Aguayo-Lobo et al. (2011)	SERNAPESCA	This study
137	N	LSR05	2009-10-05	Est. from Loc.	-46.6472	-73.9092	Adult	M	San Rafael Lagoon	XI	Ice	-	-	Record from SR Catalog	SR Catalog	This study
117	Y	-	2010-08-06	Est. from Loc.	-33.326	-71.65	Juvenile	-	Algarrobo Norte Beach	V	-	-	-	-	SERNAPESCA	Aguayo-Lobo et al. (2011)
138	N	-	2010-09-21	Est. from Loc.	-39.893	-73.386	Adult	F	Muelle Viejo Mancera Beach	XIV	-	Dead	-	-	SERNAPESCA	This study
139	N	TF02	2010-12-10	Est. from Loc.	-54.6794	-69.5111	Adult	F	Parry Fjord, Almirantazgo Sound	XII	Ice	Good	-	Record from TF Catalog	TF Catalog	This study
132	Y	TF01	2010-12-14	Est. from Loc.	-54.6792	-69.5111	Adult	F	Parry Fjord, Almirantazgo Sound	XII	Ice	Good	-	Record from TF Catalog	TF Catalog	This study
139	Y	TF02	2010-12-14	Est. from Loc.	-54.6794	-69.5111	Adult	F	Parry Fjord, Almirantazgo Sound	XII	Ice	Good	-	Record from TF Catalog	TF Catalog	This study
140	N	-	2010-12-14	Est. from Loc.	-54.6794	-69.5111	Adult	-	Parry Fjord, Almirantazgo Sound	XII	Ice	Good	-	Unknown animal from TF database	TF Catalog	This study
141	N	-	2010-12-14	Est. from Loc.	-54.6794	-69.5111	Adult	F	Parry Fjord, Almirantazgo Sound	XII	Ice	Good	-	Unknown animal from TF database	TF Catalog	This study
142	N	-	2010-12-14	Est. from Loc.	-54.6794	-69.5111	Adult	-	Parry Fjord, Almirantazgo Sound	XII	Ice	Good	-	Unknown animal from TF database	TF Catalog	This study
142	Y	-	2010-12-15	Est. from Loc.	-54.6794	-69.5111	Adult	-	Parry Fjord, Almirantazgo Sound	XII	Ice	Good	-	Unknown animal from TF database	TF Catalog	This study
132	Y	TF01	2011-02-19	Est. from Loc.	-54.6794	-69.5111	Adult	F	Parry Fjord, Almirantazgo Sound	XII	Ice	Good	-	Record from TF Catalog; Animal molting	TF Catalog	This study
143	N	-	2011-08-29	Est. from Loc.	-53.114	-70.874	-	M	Tres Puentes. Punta Arenas	XII	-	-	-	-	SERNAPESCA	This study
144	N	-	2011-10-12	Est. from Loc.	-37.234	-73.438	-	-	Desembocadura Río Tubúl	VIII	-	-	-	Likely 119	SERNAPESCA	This study
132	Y	TF01	2012-01-10	Est. from Loc.	-54.6794	-69.5111	Adult	F	Parry Fjord, Almirantazgo Sound	XII	Water	Good	-	Record from TF Catalog	TF Catalog	This study
139	Y	TF02	2012-01-10	Est. from Loc.	-54.6794	-69.5111	Adult	F	Parry Fjord, Almirantazgo Sound	XII	Ice	Good	-	Record from TF Catalog	TF Catalog	This study
145	N	-	2012-08-23	Est. from Loc.	-36.717	-73.12	Juvenile	M	María Isabel Thno Sector	VIII	Land	Emaciated	180	Gravel beach	SERNAPESCA	This study
123	Y	LSR02	2012-11-19	Est. from Loc.	-46.6472	-73.9092	Adult	F	San Rafael Lagoon	XI	Ice	-	-	Record from SR Catalog	SR Catalog	This study
146	N	LSR06	2012-11-19	Est. from Loc.	-46.6472	-73.9092	Adult	M	San Rafael Lagoon	XI	Ice	-	-	Record from SR Catalog	SR Catalog	This study
147	N	LSR07	2012-11-19	Est. from Loc.	-46.6472	-73.9092	Adult	F	San Rafael Lagoon	XI	Ice	-	-	Record from SR Catalog	SR Catalog	This study
148	N	LSR04	2013-01-20	Est. from Loc.	-46.6472	-73.9092	Adult	M	San Rafael Lagoon	XI	Water	-	-	Record from SR Catalog	SR Catalog	This study
149	N	-	2013-01-22	Field GPS	-46.6472	-73.9092	Adult	-	San Rafael Lagoon	XI	Ice	-	-	-	CONAF survey	This study
150	N	-	2013-01-22	Field GPS	-46.6472	-73.9092	Adult	-	San Rafael Lagoon	XI	Ice	-	-	-	CONAF survey	This study
151	N	-	2013-01-22	Field GPS	-46.6472	-73.9092	Adult	-	San Rafael Lagoon	XI	Ice	-	-	-	CONAF survey	This study
152	N	-	2013-02-24	Field GPS	-46.6721	-73.9128	Adult	-	San Rafael Lagoon	XI	Ice	-	-	-	CONAF survey	This study
153	N	-	2013-02-24	Field GPS	-46.6721	-73.9128	Adult	-	San Rafael Lagoon	XI	Ice	-	-	-	CONAF survey	This study
154	N	-	2013-02-26	Est. from Loc.	-54.701	-69.484	Juvenile	-	Parry Fjord, Almirantazgo Sound	XII	Land	Dead	200	Gravel beach; Beheaded	SERNAPESCA	This study
148	Y	LSR04	2013-03-03	Field GPS	-46.6631	-73.8837	Adult	M	San Rafael Lagoon	XI	Water	-	-	Identified from SR Catalog	CONAF survey	This study
155	N	-	2013-03-03	Field GPS	-46.6631	-73.8837	Adult	-	San Rafael Lagoon	XI	Water	-	-	-	CONAF survey	This study
156	N	-	2013-03-03	Field GPS	-46.6631	-73.8837	Adult	-	San Rafael Lagoon	XI	Water	-	-	-	CONAF survey	This study
157	N	-	2013-03-03	Field GPS	-46.6631	-73.8837	Adult	-	San Rafael Lagoon	XI	Water	-	-	-	CONAF survey	This study
158	N	-	2013-03-03	Field GPS	-46.6631	-73.8837	Adult	-	San Rafael Lagoon	XI	Water	-	-	-	CONAF survey	This study
159	N	-	2013-04-27	Field GPS	-46.6637	-73.9414	Adult	-	San Rafael Lagoon	XI	Ice	-	-	-	CONAF survey	This study
147	Y	LSR07	2013-04-27	Field GPS	-46.6637	-73.9414	Adult	F	San Rafael Lagoon	XI	Ice	-	-	Identified from SR Catalog	CONAF survey	This study
160	N	-	2013-06-07	Field GPS	-46.6655	-73.9221	Adult	F	San Rafael Lagoon	XI	Ice	-	-	-	CONAF survey	This study
161	N	LSR03	2013-07-30	Field GPS	-45.7662	-73.9936	Adult	M	San Rafael Lagoon	XI	Ice	-	-	Identified from SR catalog	CONAF survey	This study
161	Y	LSR03	2013-08-12	Field GPS	-46.6549	-73.898	Adult	M	San Rafael Lagoon	XI	Ice	-	-	Identified from SR catalog	CONAF survey	This study
162	N	-	2013-08-25	Est. from Loc.	-53.4	-70.88	Juvenile	-	Bahía Lomas, Punta Arenas	XII	Sand	Good	-	Pictures and data provided by Ricardo Matus	TF Catalog	This study
163	N	-	2013-08-29	Field GPS	-46.7177	-73.9718	Adult	F	San Rafael Lagoon	XI	Water	-	-	Observed feeding in water	CONAF survey	This study
161	Y	LSR03	2013-09-03	Field GPS	-46.6549	-73.898	Adult	M	San Rafael Lagoon	XI	Ice	-	-	Identified from SR catalog	CONAF survey	This study
146	Y	LSR06	2013-10-23	Est. from Loc.	-46.6472	-73.9092	Adult	M	San Rafael Lagoon	XI	Ice	-	-	Record from SR catalog	SR Catalog	This study
123	Y	LSR02	2013-10-25	Field GPS	-46.6549	-73.898	Adult	F	San Rafael Lagoon	XI	Ice	-	-	Identified from SR Catalog; Mother of 124	CONAF survey	Boop (2014)**, Acevedo et al. (2017), van der Linde et al. (2022)
124	Y	-	2013-10-25	Field GPS	-46.6549	-73.898	Pup	-	San Rafael Lagoon	XI	Ice	-	-	Pup from 123	CONAF survey	Boop (2014)**, Acevedo et al. (2017), van der Linde et al. (2022)
164	N	-	2013-12-07	Field GPS	-46.6548	-73.898	Adult	M	San Rafael Lagoon	XI	Ice	-	-	-	CONAF survey	This study
148	Y	LSR04	2014-01-18	Est. from Loc.	-46.6472	-73.9092	Adult	M	San Rafael Lagoon	XI	Ice	-	-	Record from SR catalog	SR Catalog	This study
135	Y	LSR01	2014-01-18	Est. from Loc.	-46.6686	-73.9097	Adult	F	San Rafael Lagoon	XI	Ice	-	-	Record from SR catalog	SR Catalog	This study
147	Y	LSR07	2014-02-20	Field GPS	-46.6549	-73.898	Adult	F	San Rafael Lagoon	XI	Ice	-	-	Identified from SR catalog	CONAF survey	This study
165	N	-	2014-03-15	Field GPS	-46.6637	-73.9414	Adult	M	San Rafael Lagoon	XI	Ice	-	-	-	CONAF survey	This study
147	Y	LSR07	2014-03-15	Field GPS	-46.6637	-73.9414	Adult	F	San Rafael Lagoon	XI	Ice	-	-	Identified from SR catalog	CONAF survey	This study
148	Y	LSR04	2014-05-09	Field GPS	-46.6635	-73.9152	Adult	M	San Rafael Lagoon	XI	Ice	-	-	Identified from SR catalog	CONAF survey	This study
166	N	-	2014-07-20	Field GPS	-46.6635	-73.9152	Adult	M	San Rafael Lagoon	XI	Ice	-	-		CONAF survey	This study
135	Y	LSR01	2014-07-20	Field GPS	-46.6635	-73.9152	Adult	F	San Rafael Lagoon	XI	Ice	-	-	Identified from SR catalog	CONAF survey	This study
167	N	-	2014-07-20	Field GPS	-46.6635	-73.9152	Adult	F	San Rafael Lagoon	XI	Ice	-	-	-	CONAF survey	This study
168	N	-	2014-08-28	Field GPS	-46.6635	-73.9152	Pup	-	San Rafael Lagoon	XI	Ice	Dead	-	Dead pup found on the beach	CONAF survey	This study
137	Y	LSR05	2014-10-06	Est. from Loc.	-46.6686	-73.9092	Adult	M	San Rafael Lagoon	XI	Ice	-	-	Identified from SR Catalog	CONAF survey	This study
146	Y	LSR06	2014-10-23	Est. from Loc.	-46.6472	-73.9092	Adult	M	San Rafael Lagoon	XI	Ice	-	-	Record from SR Catalog	SR Catalog	This study
123	Y	LSR02	2014-11-20	Field GPS	-46.6307	-73.9108	Adult	F	San Rafael Lagoon	XI	Ice	-	-	Identified from SR catalog	CONAF survey	This study
169	N	LSR08	2014-12-21	Field GPS	-46.6214	-73.9116	Adult	M	San Rafael Lagoon	XI	Ice	-	-	Identified from SR Catalog	CONAF survey	This study
170	N	-	2014-12-21	Field GPS	-46.6214	-73.9116	Adult	F	San Rafael Lagoon	XI	Ice	-	-		CONAF survey	This study
123	Y	LSR02	2014-12-21	Est. from Loc.	-46.6472	-73.9092	Adult	F	San Rafael Lagoon	XI	Ice	-	-	Record from SR Catalog	SR Catalog	This study
146	Y	LSR06	2015-01-06	Field GPS	-46.6214	-73.9116	Adult	M	San Rafael Lagoon	XI	Ice	-	-	Identified from SR Catalog	CONAF survey	This study
147	Y	LSR07	2015-02-15	Est. from Loc.	-46.6686	-73.8667	Adult	F	San Rafael Lagoon	XI	Ice	-	-	Identified from SR Catalog	CONAF survey	This study
171	N	-	2015-02-22	Est. from Loc.	-54.7	-69.48	Juvenile	-	Parry Fjord, Almirantazgo Sound	XII	Ice	-	-	Possibly a small male adult; Unknown animal from TF database; Animal molting	TF Catalog	This study
139	Y	TF02	2015-03-16	Est. from Loc.	-54.685	-69.42	Adult	F	Parry Fjord, Almirantazgo Sound (Cuevas)	XII	Ice	Good	-	Record from TF Catalog	TF Catalog	This study
169	Y	LSR08	2015-03-24	Field GPS	-46.642	-73.9367	Adult	M	San Rafael Lagoon	XI	Ice	-	-	Identified from SR Catalog	CONAF survey	This study
148	Y	LSR04	2015-04-05	Est. from Loc.	-46.6472	-73.9092	Adult	M	San Rafael Lagoon	XI	Ice	-	-	Record from SR Catalog	SR Catalog	This study
146	Y	LSR06	2015-04-14	Est. from Loc.	-46.6472	-73.9092	Adult	M	San Rafael Lagoon	XI	Ice	-	-	Record from SR Catalog	SR Catalog	This study
135	Y	LSR01	2015-04-14	Est. from Loc.	-46.6686	-73.9097	Adult	F	San Rafael Lagoon	XI	Ice	-	-	Record from SR Catalog	SR Catalog	This study
169	Y	LSR08	2015-04-14	Est. from Loc.	-46.6686	-73.9097	Adult	M	San Rafael Lagoon	XI	Ice	-	-	Record from SR Catalog	SR Catalog	This study
172	N	-	2015-04-15	Field GPS	-46.6955	-73.9156	Adult	M	San Rafael Lagoon	XI	Ice	-	-	-	CONAF survey	This study
173	N	-	2015-04-15	Field GPS	-46.6955	-73.9156	Adult	F	San Rafael Lagoon	XI	Ice	-	-	-	CONAF survey	This study
174	N	-	2015-04-15	Field GPS	-46.6955	-73.9156	Adult	F	San Rafael Lagoon	XI	Ice	-	-	-	CONAF survey	This study
175	N	-	2015-04-15	Field GPS	-46.6955	-73.9156	Adult	F	San Rafael Lagoon	XI	Ice	-	-	-	CONAF survey	This study
176	N	-	2015-05-01	Field GPS	-46.6961	-73.9106	Adult	M	San Rafael Lagoon	XI	Ice	-	-	-	CONAF survey	This study
135	Y	LSR01	2015-05-13	Est. from Loc.	-46.6686	-73.9097	Adult	F	San Rafael Lagoon	XI	Ice	-	-	Record from SR Catalog	SR Catalog	This study
177	N	-	2015-07-08	Field GPS	-53.252	-70.939	Adult	-	Río de los Ciervos	XII	Land	Good	170	Gravel beach	SERNAPESCA	This study
178	N	-	2015-08-02	Est. from Loc.	-53.04	-70.84	Juvenile	-	Chabunco Sector	XII	Land	Good	150	Gravel beach (GPS reported wrong. Corrected based on described location)	SERNAPESCA	This study
178	Y	-	2015-08-05	Field GPS	-53.127	-70.859	Juvenile	-	Muelle Mardones	XII	Land	Good	180	Sand beach; Same animal as 178 but different length reported	SERNAPESCA	This study
146	Y	LSR06	2015-08-13	Field GPS	-46.6641	-73.8736	Adult	M	San Rafael Lagoon	XI	Ice	-	-	Identified from SR Catalog	CONAF survey	This study
137	Y	LSR05	2015-08-13	Field GPS	-46.6641	-73.8736	Adult	M	San Rafael Lagoon	XI	Ice	-	-	Identified from SR Catalog	CONAF survey	This study
135	Y	LSR01	2015-08-31	Est. from Loc.	-46.6686	-73.9097	Adult	F	San Rafael Lagoon	XI	Ice	-	-	Record from SR Catalog	SR Catalog	This study
135	Y	LSR01	2015-09-01	Field GPS	-46.6887	-73.9008	Adult	F	San Rafael Lagoon	XI	Ice	-	-	Identified from SR Catalog	CONAF survey	This study
146	Y	LSR06	2015-10-01	Field GPS	-46.6686	-73.9097	Adult	M	San Rafael Lagoon	XI	Ice	-	-	Identified from SR Catalog	CONAF survey	This study
135	Y	LSR01	2015-10-01	Field GPS	-46.6686	-73.9097	Adult	F	San Rafael Lagoon	XI	Ice	-	-	Identified from SR Catalog	CONAF survey	This study
137	Y	LSR05	2015-10-01	Est. from Loc.	-46.6472	-73.9092	Adult	M	San Rafael Lagoon	XI	Ice	-	-	Record from SR Catalog	SR Catalog	This study
179	N	-	2015-10-24	Field GPS	-43.769	-72.971	Adult	-	Puerto Raúl Marín Balmaceda	XI	Land	Good	300	Sand beach	SERNAPESCA	This study
180	N	TF14	2015-11-13	Est. from Loc.	-54.64	-69.39	Adult	F	Parry Fjord, Almirantazgo Sound	XII	Ice	Good	-	Record from TF Catalog (TF014)	TF Catalog	This study
181	N	-	2015-11-20	Field GPS	-54.53	-70.19	Adult	-	Hyatt Sound, D'Agostini Sound	XII	Ice	Good	-	Unknown animals from TF database	TF Catalog	This study
146	Y	LSR06	2015-12-14	Est. from Loc.	-46.6686	-73.9097	Adult	M	San Rafael Lagoon	XI	Ice	-	-	Record from SR Catalog	SR Catalog	This study
135	Y	LSR01	2015-12-29	Est. from Loc.	-46.6686	-73.9097	Adult	F	San Rafael Lagoon	XI	Ice	-	-	Record from SR Catalog	SR Catalog	This study
146	Y	LSR06	2016-01-13	Est. from Loc.	-46.6686	-73.9097	Adult	M	San Rafael Lagoon	XI	Ice	-	-	Record from SR Catalog	SR Catalog	This study
182	N	TF03	2016-01-21	Field GPS	-54.54	-70.18	Adult	F	Hyatt Sound, D'Agostini Sound	XII	Ice	Good	-	Record from TF Catalog	TF Catalog	This study
148	Y	LSR04	2016-01-31	Est. from Loc.	-46.6686	-73.8667	Adult	M	San Rafael Lagoon	XI	Ice	-	-	Identified from SR Catalog	CONAF survey	This study
148	Y	LSR04	2016-02-04	Field GPS	-46.6108	-73.955	Adult	M	San Rafael Lagoon	XI	Ice	-	-	Identified from SR Catalog	CONAF survey	This study
147	Y	LSR07	2016-02-04	Field GPS	-46.6108	-73.955	Adult	F	San Rafael Lagoon	XI	Ice	-	-	Identified from SR Catalog	CONAF survey	This study
146	Y	LSR06	2016-02-04	Field GPS	-46.6108	-73.955	Adult	M	San Rafael Lagoon	XI	Ice	-	-	Identified from SR Catalog	CONAF survey	This study
183	N	-	2016-02-15	Est. from Loc.	-54.64	-69.39	Adult	M	Parry Fjord, Almirantazgo Sound	XII	Ice	Good	-	Unknown animals from TF database	TF Catalog	This study
184	N	-	2016-02-25	Est. from Loc.	-54.685	-69.42	Adult	-	Parry Fjord, Almirantazgo Sound (Cuevas)	XII	Ice	Good	-	Unknown animals from TF database	TF Catalog	This study
147	Y	LSR07	2016-03-11	Est. from Loc.	-46.6686	-73.9097	Adult	F	San Rafael Lagoon	XI	Ice	-	-	Record from SR Catalog	SR Catalog	This study
146	Y	LSR06	2016-04-01	Field GPS	-46.6686	-73.8667	Adult	M	San Rafael Lagoon	XI	Ice	-	-	Identified from SR Catalog	CONAF survey	This study
185	N	-	2016-04-01	Est. from Loc.	-46.6686	-73.8667	Adult	F	San Rafael Lagoon	XI	Ice	-	-	-	CONAF survey	This study
169	Y	LSR08	2016-04-01	Est. from Loc.	-46.6686	-73.9097	Adult	M	San Rafael Lagoon	XI	Ice	-	-	Record from SR Catalog	SR Catalog	This study
161	Y	LSR03	2016-05-08	Est. from Loc.	-46.6686	-73.9097	Adult	M	San Rafael Lagoon	XI	Ice	-	-	Record from SR Catalog	SR Catalog	This study
148	Y	LSR04	2016-07-14	Field GPS	-46.6584	-73.8793	Adult	M	San Rafael Lagoon	XI	Ice	-	-	Identified from SR Catalog	CONAF survey	This study
135	Y	LSR01	2016-08-09	Est. from Loc.	-46.6686	-73.9097	Adult	F	San Rafael Lagoon	XI	Ice	-	-	Record from SR Catalog	SR Catalog	This study
148	Y	LSR04	2016-08-09	Est. from Loc.	-46.6686	-73.9097	Adult	M	San Rafael Lagoon	XI	Ice	-	-	Record from SR Catalog	SR Catalog	This study
146	Y	LSR06	2016-08-09	Est. from Loc.	-46.6686	-73.9097	Adult	M	San Rafael Lagoon	XI	Ice	-	-	Record from SR Catalog	SR Catalog	This study
147	Y	LSR07	2016-08-09	Est. from Loc.	-46.6686	-73.9097	Adult	F	San Rafael Lagoon	XI	Ice	-	-	Record from SR Catalog	SR Catalog	This study
123	Y	LSR02	2016-09-01	Field GPS	-46.6721	-73.9128	Adult	F	San Rafael Lagoon	XI	Ice	-	-	Identified from SR Catalog	CONAF survey	This study
135	Y	LSR01	2016-09-01	Field GPS	-46.6721	-73.9128	Adult	F	San Rafael Lagoon	XI	Ice	-	-	Identified from SR Catalog	CONAF survey	This study
169	Y	LSR08	2016-09-01	Field GPS	-46.6721	-73.9128	Adult	M	San Rafael Lagoon	XI	Ice	-	-	Identified from SR Catalog	CONAF survey	This study
186	N	-	2016-09-01	Field GPS	-46.6721	-73.9128	Adult	-	San Rafael Lagoon	XI	Water	-	-	-	CONAF survey	This study
147	Y	LSR07	2016-09-12	Est. from Loc.	-46.6472	-73.9092	Adult	F	San Rafael Lagoon	XI	Ice	-	-	Record from SR Catalog	SR Catalog	This study
187	N	-	2016-10-19	Field GPS	-37.467	-73.591	-	-	Quiapo Beach	VIII	Land	Good	-	Sand beach	SERNAPESCA	This study
161	Y	LSR03	2016-10-23	Est. from Loc.	-46.6686	-73.9097	Adult	M	San Rafael Lagoon	XI	Ice	-	-	Record from SR Catalog	SR Catalog	This study
146	Y	LSR06	2016-11-03	Field GPS	-46.6471	-73.8997	Adult	M	San Rafael Lagoon	XI	Ice	-	-	Identified from SR Catalog	CONAF survey	This study
188	N	TF04	2017-01-17	Field GPS	-54.64	-69.39	Adult	F	Parry Fjord, Almirantazgo Sound	XII	Ice	Good	-	Record from TF Catalog	TF Catalog	This study
189	N	-	2017-01-17	Field GPS	-54.64	-69.39	Adult	-	Parry Fjord, Almirantazgo Sound	XII	Ice	Good	-	Unknown animals from TF database	TF Catalog	This study
190	N	TF12	2017-01-23	Est. from Loc.	-54.685	-69.42	Juvenile	M	Parry Fjord, Almirantazgo Sound (Cuevas)	XII	Ice	Good	-	Record from TF Catalog. Animal molting	TF Catalog	This study
148	Y	LSR04	2017-01-26	Field GPS	-46.6612	-73.8986	Adult	M	San Rafael Lagoon	XI	Ice	-	-	Identified from SR Catalog	CONAF survey	This study
135	Y	LSR01	2017-01-26	Field GPS	-46.6618	-73.9039	Adult	F	San Rafael Lagoon	XI	Ice	-	-	Identified from SR Catalog	CONAF survey	This study
191	N	-	2017-02-02	Est. from Loc.	-54.7	-69.48	Juvenile	-	SW Parry Fjord, Almirantazgo Sound	XII	Ice	Good	-	-	TF Catalog	This study
135	Y	LSR01	2017-02-06	Est. from Loc.	-46.6686	-73.9097	Adult	F	San Rafael Lagoon	XI	Ice	-	-	Record from SR Catalog	SR Catalog	This study
192	N	-	2017-02-12	Field GPS	-36.638	-72.958	Adult	-	Bellavista Beach	VIII	Land	Dead	-	Sand beach	SERNAPESCA	This study
188	Y	TF04	2017-02-14	Field GPS	-54.62	-69.37	Adult	F	Parry Fjord, Almirantazgo Sound	XII	Ice	Good	-	Record from TF Catalog	TF Catalog	This study
193	N	TF05	2017-02-14	Field GPS	-54.67	-69.42	Adult	M	Parry Fjord, Almirantazgo Sound	XII	Ice	Good	-	Record from TF Catalog	TF Catalog	This study
193	Y	TF05	2017-02-27	Field GPS	-54.62	-69.37	Adult	M	Parry Fjord, Almirantazgo Sound	XII	Ice	Good	-	Record from TF Catalog	TF Catalog	This study
161	Y	LSR03	2017-03-19	Field GPS	-46.6979	-73.9091	Adult	M	San Rafael Lagoon	XI	Ice	-	-	Identified from SR Catalog	CONAF survey	This study
161	Y	LSR03	2017-04-15	Field GPS	-46.6582	-74.0033	Adult	M	San Rafael Lagoon	XI	Ice	-	-	Identified from SR Catalog	CONAF survey	This study
123	Y	LSR02	2017-05-09	Est. from Loc.	-46.6686	-73.9097	Adult	F	San Rafael Lagoon	XI	Ice	-	-	Record from SR Catalog	SR Catalog	This study
148	Y	LSR04	2017-05-09	Est. from Loc.	-46.6686	-73.9097	Adult	M	San Rafael Lagoon	XI	Ice	-	-	Record from SR Catalog	SR Catalog	This study
169	Y	LSR08	2017-05-09	Est. from Loc.	-46.6686	-73.9097	Adult	M	San Rafael Lagoon	XI	Ice	-	-	Record from SR Catalog	SR Catalog	This study
194	N	TF09	2017-05-30	Field GPS	-54.62	-69.36	Adult	F	Parry Fjord, Almirantazgo Sound	XII	Ice	Good	-	Record from TF Catalog	TF Catalog	This study
195	N	-	2017-08-06	Field GPS	-32.996	-71.549	Juvenile	F	De los Cañones Beach	V	Land	Inactive	190	Sand beach	SERNAPESCA	This study
195	Y	-	2017-08-07	Field GPS	-33.013	-71.555	Juvenile	F	El Sol Beach	V	Land	Inactive	190	Sand beach; same as 195	SERNAPESCA	This study
196	N	-	2017-10-25	Field GPS	-36.751	-73.185	Adult	-	Ramuntcho	VIII	Land	Emaciated	200	Sand beach	SERNAPESCA	This study
196	Y	-	2017-10-29	Field GPS	-36.76	-73.174	Adult	-	Lenga Beach	VIII	Land	Good	200	Sand beach; Same as 196	SERNAPESCA	This study
196	Y	-	2017-11-03	Field GPS	-36.751	-73.185	Adult	-	Ramuntcho Beach	VIII	Land	Good	210	Sand beach; Same as 196	SERNAPESCA	This study
193	Y	TF05	2017-11-04	Est. from Loc.	-54.6794	-69.5111	Adult	-	Parry Fjord, Almirantazgo Sound	XII	Ice	Good	-	Record from TF Catalog	TF Catalog	This study
197	N	-	2017-11-16	Field GPS	-33.637	-78.831	Adult	-	Juan Bautista, Juan Feranndez	V	Land	Emaciated	250	Haulout in human construction	SERNAPESCA	This study
146	Y	LSR06	2017-11-28	Est. from Loc.	-46.6686	-73.9097	Adult	M	San Rafael Lagoon	XI	Ice	-	-	Record from SR Catalog	SR Catalog	This study
123	Y	LSR02	2018-01-12	Est. from Loc.	-46.6686	-73.9097	Adult	F	San Rafael Lagoon	XI	Ice	-	-	Record from SR Catalog	SR Catalog	This study
139	Y	TF02	2018-01-12	Field GPS	-54.6722	-69.45	Adult	F	Parry Fjord, Almirantazgo Sound	XII	Ice	Good	-	Record from TF Catalog	TF Catalog	This study
198	N	-	2018-01-12	Est. from Loc.	-54.6722	-69.45	Adult	M	Parry Fjord, Almirantazgo Sound	XII	Ice	Good	-	Unknown animals from TF database	TF Catalog	This study
198	Y	-	2018-01-27	Est. from Loc.	-54.6722	-69.45	Adult	M	Parry Fjord, Almirantazgo Sound	XII	Ice	Good	-	Unknown animals from TF database; Same as 198	TF Catalog	This study
199	N	-	2018-02-04	Est. from Loc.	-54.6722	-69.45	Adult	M	Parry Fjord, Almirantazgo Sound	XII	Ice	Good	-	Unknown animals from TF database	TF Catalog	This study
200	N	TF06	2018-02-04	Field GPS	-54.68	-69.45	Adult	F	Parry Fjord, Almirantazgo Sound	XII	Ice	Good	-	Record from TF Catalog	TF Catalog	This study
201	N	TF07	2018-02-13	Field GPS	-54.675	-69.45	Adult	F	Parry Fjord, Almirantazgo Sound	XII	Ice	Good	-	Record from TF Catalog	TF Catalog	This study
200	Y	TF06	2018-02-20	Field GPS	-54.68	-69.46	Adult	F	Parry Fjord, Almirantazgo Sound	XII	Ice	Good	-	Record from TF Catalog	TF Catalog	This study
139	Y	TF02	2018-04-04	Est. from Loc.	-54.68	-69.485	Adult	F	Parry Fjord, Almirantazgo Sound	XII	Ice	Good	-	Record from TF Catalog	TF Catalog	This study
202	N	TF08	2018-04-04	Field GPS	-54.68	-69.485	Adult	F	Parry Fjord, Almirantazgo Sound	XII	Ice	Good	-	Record from TF Catalog	TF Catalog	This study
203	N	-	2018-07-20	Field GPS	-42.915	-72.719	-	-	Chaiten	X	Land	Good	200	Sand beach	SERNAPESCA	This study
204	N	-	2018-10-02	Field GPS	-27.127	-109.276	Juvenile	M	Easter Island - Hotu Iti Bay	V	Land	Inactive	200	Gravel beach	SERNAPESCA	This study
146	Y	LSR06	2018-10-22	Field GPS	-46.6618	-73.9039	Adult	M	San Rafael Lagoon	XI	Ice	-	-	Identified from SR Catalog	CONAF survey	This study
202	Y	TF08	2018-11-14	Est. from Loc.	-54.68	-69.46	Adult	F	Parry Fjord, Almirantazgo Sound	XII	Ice	Good	-	Record from TF Catalog. Animal molting	TF Catalog	This study
205	N	TF10	2018-11-14	Est. from Loc.	-54.685	-69.42	Adult	M	Parry Fjord, Almirantazgo Sound (Cuevas)	XII	Ice	Good	-	Record from TF Catalog. Animal molting	TF Catalog	This study
146	Y	LSR06	2018-11-27	Field GPS	-46.6688	-74.0128	Adult	M	San Rafael Lagoon	XI	Ice	-	-	Identified from SR Catalog	CONAF survey	This study
206	N	-	2018-11-27	Field GPS	-46.6341	-73.998	Pup	-	San Rafael Lagoon	XI	Ice	-	-	-	CONAF survey	This study
123	Y	LSR02	2018-12-01	Est. from Loc.	-46.6472	-73.9092	Adult	F	San Rafael Lagoon	XI	Ice	-	-	Record from SR Catalog	SR Catalog	This study
207	N	-	2018-12-18	Field GPS	-46.6493	-73.8742	Adult	M	San Rafael Lagoon	XI	Ice	-	-	-	CONAF survey	This study
147	Y	LSR07	2018-12-18	Field GPS	-46.6465	-73.8761	Adult	F	San Rafael Lagoon	XI	Ice	-	-	Identified from SR Catalog	CONAF survey	This study
132	Y	TF01	2018-12-29	Field GPS	-54.685	-69.42	Adult	F	Parry Fjord, Almirantazgo Sound (Cuevas)	XII	Ice	Good	-	Record from TF Catalog	TF Catalog	This study
135	Y	LSR01	2019-01-08	Est. from Loc.	-46.6686	-73.9097	Adult	F	San Rafael Lagoon	XI	Ice	-	-	Record from SR Catalog	SR Catalog	This study
208	N	-	2019-01-14	Est. from Loc.	-46.6667	-73.8667	Pup	-	San Rafael Lagoon	XI	Ice	-	-	No photographic evidence associated with the sighting	CONAF survey	This study
209	N	-	2019-01-14	Est. from Loc.	-46.6667	-73.8667	Pup	-	San Rafael Lagoon	XI	Ice	-	-	No photographic evidence associated with the sighting	CONAF survey	This study
210	N	-	2019-01-14	Est. from Loc.	-46.6667	-73.8667	Adult	F	San Rafael Lagoon	XI	Ice	-	-	-	CONAF survey	This study
211	N	-	2019-01-14	Est. from Loc.	-46.6667	-73.8667	Adult	F	San Rafael Lagoon	XI	Ice	-	-	-	CONAF survey	This study
212	N	-	2019-01-14	Est. from Loc.	-46.6667	-73.8667	Adult	M	San Rafael Lagoon	XI	Ice	-	-	-	CONAF survey	This study
213	N	-	2019-01-14	Est. from Loc.	-46.6667	-73.8667	Adult	M	San Rafael Lagoon	XI	Ice	-	-	-	CONAF survey	This study
214	N	-	2019-01-14	Est. from Loc.	-46.6667	-73.8667	Adult	M	San Rafael Lagoon	XI	Ice	-	-	-	CONAF survey	This study
137	Y	LSR05	2019-01-14	Est. from Loc.	-46.6472	-73.9092	Adult	M	San Rafael Lagoon	XI	Ice	-	-	Record from SR Catalog	SR Catalog	This study
148	Y	LSR04	2019-01-14	Est. from Loc.	-46.6686	-73.9097	Adult	M	San Rafael Lagoon	XI	Ice	-	-	Record from SR Catalog	SR Catalog	This study
123	Y	LSR02	2019-01-14	Est. from Loc.	-46.6472	-73.9092	Adult	F	San Rafael Lagoon	XI	Ice	-	-	Record from SR Catalog	SR Catalog	This study
169	Y	LSR08	2019-01-14	Est. from Loc.	-46.6472	-73.9092	Adult	M	San Rafael Lagoon	XI	Ice	-	-	Record from SR Catalog	SR Catalog	This study
146	Y	LSR06	2019-01-25	Est. from Loc.	-46.6686	-73.9097	Adult	M	San Rafael Lagoon	XI	Ice	-	-	Record from SR Catalog	SR Catalog	This study
169	Y	LSR08	2019-02-02	Field GPS	-46.6721	-73.9128	Adult	M	San Rafael Lagoon	XI	Ice	-	-	Identified from SR Catalog	CONAF survey	This study
161	Y	LSR03	2019-02-02	Est. from Loc.	-46.6686	-73.9097	Adult	M	San Rafael Lagoon	XI	Ice	-	-	Record from SR Catalog	SR Catalog	This study
123	Y	LSR02	2019-02-08	Est. from Loc.	-46.6472	-73.9092	Adult	F	San Rafael Lagoon	XI	Ice	-	-	Record from SR Catalog	SR Catalog	This study
215	N	-	2019-02-16	Field GPS	-46.6791	-73.8823	Adult	M	San Rafael Lagoon	XI	Ice	-	-	-	CONAF survey	This study
132	Y	TF01	2019-02-22	Field GPS	-54.6667	-69.35	Adult	F	Parry Fjord, Almirantazgo Sound (Cuevas)	XII	Ice	Good	-	Record from TF Catalog. Animal molting	TF Catalog	This study
216	N	LSR10	2019-03-01	Est. from Loc.	-46.6686	-73.9097	Adult	F	San Rafael Lagoon	XI	Ice	-	-	Record from SR Catalog	SR Catalog	This study
148	Y	LSR04	2019-03-07	Est. from Loc.	-46.6686	-73.9097	Adult	M	San Rafael Lagoon	XI	Ice	-	-	Record from SR Catalog	SR Catalog	This study
217	N	-	2019-03-11	Est. from Loc.	-46.6686	-73.8667	Adult	M	San Rafael Lagoon	XI	Ice	-	-	-	CONAF survey	This study
169	Y	LSR08	2019-04-01	Field GPS	-46.6582	-74.0033	Adult	M	San Rafael Lagoon	XI	Ice	-	-	Identified from SR Catalog	CONAF survey	This study
132	Y	TF01	2019-05-03	Est. from Loc.	-54.6792	-69.5111	Adult	F	Parry Fjord, Almirantazgo Sound	XII	Ice	Good	-	Record from TF Catalog	TF Catalog	This study
146	Y	LSR06	2019-06-14	Field GPS	-46.6599	-73.9216	Adult	M	San Rafael Lagoon	XI	Ice	-	-	Identified from SR Catalog	CONAF survey	This study
123	Y	LSR02	2019-06-14	Est. from Loc.	-46.6472	-73.9092	Adult	F	San Rafael Lagoon	XI	Ice	-	-	Record from SR Catalog	SR Catalog	This study
218	N	-	2019-06-28	Field GPS	-51.733	-72.514	Juvenile	-	Rampa Costanera Natales	XII	Land	Inactive	190	Haulout in human construction	SERNAPESCA	This study
146	Y	LSR06	2019-07-06	Est. from Loc.	-46.6686	-73.9097	Adult	M	San Rafael Lagoon	XI	Ice	-	-	Record from SR Catalog	SR Catalog	This study
219	N	-	2019-07-22	Field GPS	-32.76	-71.486	-	-	Loncura Beach	V	Land	-	-	Sand beach	SERNAPESCA	This study
220	N	-	2019-08-12	Field GPS	-44.745	-72.696	Adult	-	Puerto Cisnes	XII	Land	Good	75	Sand beach	SERNAPESCA	This study
221	N	-	2019-09-05	Field GPS	-46.7423	-73.9491	Adult	F	San Rafael Lagoon	XI	Ice	-	-	-	CONAF survey	This study
222	N	TF11	2019-11-09	Field GPS	-54.685	-69.42	Adult	M	Parry Fjord, Almirantazgo Sound (Cuevas)	XII	Ice	Good	-	Recorded from TF Catalog. Animal molting	TF Catalog	This study
169	Y	LSR08	2019-11-10	Field GPS	-46.6582	-74.0033	Adult	M	San Rafael Lagoon	XI	Ice	-	-	Record from SR Catalog	SR Catalog	This study
223	N	LSR09	2019-11-22	Field GPS	-46.6571	-73.9241	Adult	M	San Rafael Lagoon	XI	Ice	-	-	Identified from SR Catalog	CONAF survey	This study
216	Y	LSR10	2019-11-22	Field GPS	-46.7015	-73.9232	Adult	F	San Rafael Lagoon	XI	Ice	-	-	Identified from SR Catalog	CONAF survey	This study
224	N	-	2019-11-22	Field GPS	-46.7015	-73.9307	Adult	M	San Rafael Lagoon	XI	Ice	-	-	-	CONAF survey	This study
225	N	-	2019-11-26	Field GPS	-39.894	-73.488	Juvenile	-	Los Liles Sector	XIV	Land/Water	Emaciated	200	Haulout in rocky Intertidal	SERNAPESCA	This study
135	Y	LSR01	2019-12-04	Est. from Loc.	-46.6686	-73.9097	Adult	F	San Rafael Lagoon	XI	Ice	-	-	Record from SR Catalog	SR Catalog	This study
226	N	-	2019-12-11	Est. from Loc.	-46.6686	-73.8667	Adult	-	San Rafael Lagoon	XI	Ice	-	-	-	CONAF survey	This study
227	N	-	2019-12-11	Est. from Loc.	-46.6686	-73.8667	Adult	-	San Rafael Lagoon	XI	Ice	-	-	-	CONAF survey	This study
147	Y	LSR07	2019-12-15	Est. from Loc.	-46.6472	-73.9092	Adult	F	San Rafael Lagoon	XI	Ice	-	-	Record from SR Catalog	SR Catalog	This study
132	Y	TF01	2019-12-18	Field GPS	-54.652	-69.42	Adult	F	Parry Fjord, Almirantazgo Sound	XII	Ice	Good	-	Record from TF Catalog	TF Catalog	This study
200	Y	TF06	2019-12-18	Field GPS	-54.65	-69.42	Adult	F	Parry Fjord, Almirantazgo Sound	XII	Ice	Good	-	Record from TF Catalog	TF Catalog	This study
161	Y	LSR03	2019-12-31	Est. from Loc.	-46.6686	-73.9097	Adult	M	San Rafael Lagoon	XI	Ice	-	-	Record from SR Catalog	SR Catalog	This study
132	Y	TF01	2020-01-04	Est. from Loc.	-54.72	-69.34	Adult	F	Parry Fjord, Almirantazgo Sound (Cuevas)	XII	Ice	Good	-	Record from TF Catalog	TF Catalog	This study
137	Y	LSR05	2020-01-09	Est. from Loc.	-46.6686	-73.9097	Adult	M	San Rafael Lagoon	XI	Ice	-	-	Record from SR Catalog	SR Catalog	This study
169	Y	LSR08	2020-01-09	Est. from Loc.	-46.6686	-73.9097	Adult	M	San Rafael Lagoon	XI	Ice	-	-	Record from SR Catalog	SR Catalog	This study
228	N	-	2020-02-28	Field GPS	-46.6491	-73.9037	Adult	M	San Rafael Lagoon	XI	Ice	-	-	-	CONAF survey	This study
229	N	-	2020-03-14	Field GPS	-46.6884	-73.8626	Adult	-	San Rafael Lagoon	XI	Water	-	-	-	CONAF survey	This study
230	N	-	2020-05-21	Field GPS	-52.455	-69.543	Juvenile	-	Primera Angostura Sector	XII	Land	Good	140	Sand beach	SERNAPESCA	This study
231	N	-	2020-07-20	Field GPS	-53.169	-70.913	Juvenile	-	Costanera of Punta Arenas	XII	Land	Good	180	Sand beach; Likely to be 230	SERNAPESCA	This study
148	Y	LSR04	2020-08-31	Field GPS	-46.6686	-73.9097	Adult	M	San Rafael Lagoon	XI	Ice	-	-	Record from SR Catalog	SR Catalog	This study
232	N	-	2020-09-30	Field GPS	-36.096	-72.814	Adult	-	Iglesia de Piedra	XVI	Land	Good	200	Sand beach	SERNAPESCA	This study
232	Y	-	2020-10-01	Field GPS	-36.139	-72.804	Adult	-	Mure Beach	XVI	Land	Good	200	Sand beach; Same as 232	SERNAPESCA	This study
233	N	-	2020-10-05	Est. from Loc.	-34.931	-72.182	-	-	Iloca Beach	VII	-	-	-	-	SERNAPESCA	This study
123	Y	LSR02	2020-10-19	Est. from Loc.	-46.6686	-73.9097	Adult	F	San Rafael Lagoon	XI	Ice	-	-	Record from SR Catalog	SR Catalog	This study
148	Y	LSR04	2020-10-19	Est. from Loc.	-46.6686	-73.9097	Adult	M	San Rafael Lagoon	XI	Ice	-	-	Record from SR Catalog	SR Catalog	This study
137	Y	LSR05	2020-10-19	Est. from Loc.	-46.6686	-73.9097	Adult	M	San Rafael Lagoon	XI	Ice	-	-	Record from SR Catalog	SR Catalog	This study
216	Y	LSR10	2020-10-19	Est. from Loc.	-46.6686	-73.9097	Adult	F	San Rafael Lagoon	XI	Ice	-	-	Record from SR Catalog	SR Catalog	This study
146	Y	LSR06	2020-10-20	Est. from Loc.	-46.6686	-73.9097	Adult	M	San Rafael Lagoon	XI	Ice	-	-	Record from SR Catalog	SR Catalog	This study
234	N	-	2020-10-23	Field GPS	-41.928	-74.037	Juvenile	-	Puñihuil	X	Land	-	160	Sand beach	SERNAPESCA	This study
169	Y	LSR08	2020-10-24	Est. from Loc.	-46.6686	-73.9097	Adult	M	San Rafael Lagoon	XI	Ice	-	-	Record from SR Catalog	SR Catalog	This study
223	Y	LSR09	2020-11-03	Est. from Loc.	-46.6686	-73.9097	Adult	M	San Rafael Lagoon	XI	Ice	-	-	Record from SR Catalog	SR Catalog	This study
200	Y	TF06	2021-02-13	Field GPS	-54.685	-69.42	Adult	F	Parry Fjord, Almirantazgo Sound (Cuevas)	XII	Ice	Good	-	Record from TF Catalog	TF Catalog	This study
235	N	-	2021-07-12	Field GPS	-53.093	-70.87	Juvenile	-	Barranco Amarillo	XII	Land	Good	150	Sand beach	SERNAPESCA	This study
235	Y	-	2021-07-15	Field GPS	-53.096	-70.874	Juvenile	-	Muelle Barranco Amarillo	XII	Land	Good	150	Sand beach; Same as 235	SERNAPESCA	This study
236	N	-	2021-09-23	Field GPS	-27.073	-109.324	Juvenile	-	Anakena Beach	V	Land	Good	210	Sand beach	SERNAPESCA	This study
237	N	-	2021-09-27	Field GPS	-37.171	-73.194	Juvenile	-	Laraquete	VIII	Land	-	100	Sand beach	SERNAPESCA	This study
238	N	-	2021-10-11	Field GPS	-53.201	-70.935	Juvenile	-	Costanera of Punta Arenas	XII	Land	Inactive	120	Sand beach	SERNAPESCA	This study
239	N	-	2021-10-19	Field GPS	-46.51	-73.889	Pup	-	San Rafael Lagoon	XI	Ice	Dead	-	-	SERNAPESCA	van der Linde et al. (2022)
205	Y	TF10	2021-11-11	Est. from Loc.	-54.685	-69.42	Adult	M	Parry Fjord, Almirantazgo Sound (Cuevas)	XII	Ice	Good	-	Identified from TF Catalog	TF-21	TF Catalog, This study
190	Y	TF12	2021-11-11	Est. from Loc.	-54.685	-69.42	Adult	M	Parry Fjord, Almirantazgo Sound (Cuevas)	XII	Ice	Good	-	Identified from TF Catalog	TF-21	TF Catalog, This study
240	N	TF13	2021-11-11	Est. from Loc.	-54.62	-69.36	Adult	F	Parry Fjord, Almirantazgo Sound	XII	Ice	Good	-	Sighting included in TF Catalog; Mother of 244. Animal molting	TF-21	TF Catalog, This study
241	N	-	2021-11-11	Est. from Loc.	-54.68	-69.46	Pup	-	Parry Fjord, Almirantazgo Sound	XII	Ice	Good	-	Pup dead; Pup of 243	TF-21	This study
242	N	-	2022-08-06	Field GPS	-41.926	-74.008	Juvenile	-	Ancud, Mar Brava Beach	X	Sand	Emaciated	170	Sand beach	SERNAPESCA	This study
243	N	-	2022-09-03	Field GPS	-53.164	-70.883	-	-	Punta Arenas, Costanera Sector	XII	Sand	Good	150	Sand beach	SERNAPESCA	This study
216	Y	LSR10	2022-12-12	Est. from Loc.	-46.6686	-73.9097	Adult	F	San Rafael Lagoon	XI	Ice	Good	-	Identified from SR Catalog	SR-22	This study
135	Y	LSR01	2022-12-14	Est. from Loc.	-46.6686	-73.9097	Adult	F	San Rafael Lagoon	XI	Ice	Good	-	Identified from SR Catalog	SR-22	This study
216	Y	LSR10	2022-12-15	Est. from Loc.	-46.6686	-73.9097	Adult	F	San Rafael Lagoon	XI	Ice	Good	-	Identified from SR Catalog	SR-22	This study
135	Y	LSR01	2022-12-15	Est. from Loc.	-46.6686	-73.9097	Adult	F	San Rafael Lagoon	XI	Ice	Good	-	Identified from SR Catalog	SR-22	This study
216	Y	LSR10	2022-12-16	Est. from Loc.	-46.6686	-73.9097	Adult	F	San Rafael Lagoon	XI	Ice	Good	-	Identified from SR Catalog	SR-22	This study
147	Y	LSR07	2022-12-16	Est. from Loc.	-46.6686	-73.9097	Adult	F	San Rafael Lagoon	XI	Ice	Good	-	Identified from SR Catalog	SR-22	Kienle et al. 2024
146	Y	LSR06	2022-12-16	Est. from Loc.	-46.6686	-73.9097	Adult	M	San Rafael Lagoon	XI	Ice	Good	-	Identified from SR Catalog	SR-22	Kienle et al. 2024
135	Y	LSR01	2022-12-17	Est. from Loc.	-46.6686	-73.9097	Adult	F	San Rafael Lagoon	XI	Ice	Good	-	Identified from SR Catalog	SR-22	This study
146	Y	LSR06	2022-12-17	Est. from Loc.	-46.6686	-73.9097	Adult	M	San Rafael Lagoon	XI	Ice	Good	-	Identified from SR Catalog	SR-22	Kienle et al. 2024
216	Y	LSR10	2022-12-17	Est. from Loc.	-46.6686	-73.9097	Adult	F	San Rafael Lagoon	XI	Ice	Good	-	Identified from SR Catalog	SR-22	This study
147	Y	LSR07	2022-12-17	Est. from Loc.	-46.6686	-73.9097	Adult	F	San Rafael Lagoon	XI	Ice	Good	-	Identified from SR Catalog	SR-22	This study
135	Y	LSR01	2022-12-19	Est. from Loc.	-46.6686	-73.9097	Adult	F	San Rafael Lagoon	XI	Ice	Good	-	Identified from SR Catalog	SR-22	This study
244	N	-	2023-04-11	Field GPS	-29.2729	-71.407	Adult	-	Unspecified Beach in "La Higuera"	IV	Land	Dead	250	Sand beach	SERNAPESCA	This study
245	N	-	2023-07-15	Field GPS	-39.67	-73.3506	Adult	-	Playa Pilolcura, Valdivia	X	Land	Good	150	Sand beach	SERNAPESCA	This study
246	N	-	2023-09-04	Field GPS	-29.454	-71.388	Juvenile	-	Playa Los Choros, La Higuera	IV	Land	Good	250	Sand beach	SERNAPESCA	This study
247	N	-	2023-10-18	Est. from Loc.	-46.6686	-73.9097	Pup	F	San Rafael Lagoon	XI	Ice	Good	-	Pup of 135	CONAF survey/SR-23	This study
135	Y	LSR01	2023-10-18	Field GPS	-46.69	-73.87	Adult	F	San Rafael Lagoon	XI	Ice	Good	-	Identified from SR Catalog; Mother of 247	CONAF survey	This study
247	Y	-	2023-11-13	Field GPS	-46.69	-73.87	Pup	F	San Rafael Lagoon	XI	Ice	Dead	-	Pup of 135	SR-23	This study
135	Y	LSR01	2023-11-13	Field GPS	-46.69	-73.87	Adult	F	San Rafael Lagoon	XI	Ice	Good	-	Identified from SR Catalog; Mother of 247	SR-23	This study
247	Y	-	2023-11-14	Field GPS	-46.69	-73.87	Pup	F	San Rafael Lagoon	XI	Ice	Dead	-	Pup of 135	SR-23	This study
148	Y	LSR04	2023-11-14	Field GPS	-46.69	-73.87	Adult	M	San Rafael Lagoon	XI	Ice	Good	-	Identified from SR Catalog	SR-23	This study
135	Y	LSR01	2023-11-14	Field GPS	-46.69	-73.86	Adult	F	San Rafael Lagoon	XI	Ice	Good	-	Identified from SR Catalog; Mother of 247	SR-23	This study
247	Y	-	2023-11-16	Field GPS	-46.69	-73.89	Pup	F	San Rafael Lagoon	XI	Ice	Dead	-	Pup of 135	SR-23	This study
216	Y	LSR10	2023-11-18	Field GPS	-46.67	-73.9	Adult	F	San Rafael Lagoon	XI	Ice	Good	-	Identified from SR Catalog	SR-23	This study
146	Y	LSR06	2023-11-21	Field GPS	-46.68	-73.89	Adult	M	San Rafael Lagoon	XI	Ice	Good	-	Identified from SR Catalog	SR-23	This study
135	Y	LSR01	2023-11-21	Field GPS	-46.67	-73.88	Adult	F	San Rafael Lagoon	XI	Ice	Good	-	Identified from SR Catalog	SR-23	This study
135	Y	LSR01	2023-11-22	Field GPS	-46.64	-73.9	Adult	F	San Rafael Lagoon	XI	Ice	Good	-	Identified from SR Catalog	SR-23	This study
169	Y	LSR08	2023-11-23	Field GPS	-46.62	-73.92	Adult	M	San Rafael Lagoon	XI	Ice	Good	-	Identified from SR Catalog	SR-23	This study
216	Y	LSR10	2023-11-23	Field GPS	-46.74	-73.94	Adult	F	San Rafael Lagoon	XI	Ice	Good	-	Identified from SR Catalog	SR-23	This study
148	Y	LSR04	2023-11-24	Field GPS	-46.65	-73.9	Adult	M	San Rafael Lagoon	XI	Ice	Good	-	Identified from SR Catalog	SR-23	This study
169	Y	LSR08	2023-11-24	Field GPS	-46.67	-73.87	Adult	M	San Rafael Lagoon	XI	Ice	Good	-	Identified from SR Catalog	SR-23	This study
135	Y	LSR01	2023-11-24	Field GPS	-46.63	-73.9	Adult	F	San Rafael Lagoon	XI	Ice	Good	-	Identified from SR Catalog	SR-23	This study
135	Y	LSR01	2023-11-25	Field GPS	-46.67	-73.87	Adult	F	San Rafael Lagoon	XI	Ice	Good	-	Identified from SR Catalog	SR-23	This study
161	Y	LSR03	2023-11-30	Field GPS	-46.69	-73.88	Adult	M	San Rafael Lagoon	XI	Ice	Good	-	Identified from SR Catalog	SR-23	This study
135	Y	LSR01	2023-11-30	Field GPS	-46.67	-73.87	Adult	F	San Rafael Lagoon	XI	Ice	Good	-	Identified from SR Catalog	SR-23	This study
169	Y	LSR08	2023-12-01	Field GPS	-46.69	-73.88	Adult	M	San Rafael Lagoon	XI	Ice	Good	-	Identified from SR Catalog	SR-23	This study
169	Y	LSR08	2023-12-02	Field GPS	46.68	-73.87	Adult	M	San Rafael Lagoon	XI	Ice	Good	-	Identified from SR Catalog	SR-23	This study
248	N	-	2023-12-14	Est. from Loc.	-54.685	-69.42	Adult	F	Parry Fjord, Almirantazgo Sound (Cuevas)	XII	Ice	Good	-	-	TF-23	This study
249	N	-	2023-12-14	Est. from Loc.	-54.685	-69.42	Adult	F	Parry Fjord, Almirantazgo Sound (Cuevas)	XII	Ice	Good	-	-	TF-23	This study
250	N	-	2023-12-15	Est. from Loc.	-54.62	-69.36	Adult	F	Parry Fjord, Almirantazgo Sound	XII	Ice	Good	-	-	TF-23	This study
180	Y	TF14	2023-12-15	Est. from Loc.	-54.62	-69.36	Adult	F	Parry Fjord, Almirantazgo Sound	XII	Ice	Good	-	Identified from TF Catalog. Animal molting	TF-23	TF Catalog, This study
249	Y	-	2023-12-16	Est. from Loc.	-54.685	-69.42	Adult	F	Parry Fjord, Almirantazgo Sound (Cuevas)	XII	Ice	Good	-	-	TF-23	This study
250	Y	-	2023-12-16	Est. from Loc.	-54.62	-69.36	Adult	F	Parry Fjord, Almirantazgo Sound	XII	Ice	Good	-	-	TF-23	This study
180	Y	TF14	2023-12-16	Est. from Loc.	-54.62	-69.36	Adult	F	Parry Fjord, Almirantazgo Sound	XII	Ice	Good	-	Identified from TF Catalog. Animal molting	TF-23	TF Catalog, This study
251	N	-	2023-12-17	Est. from Loc.	-54.685	-69.42	Adult	F	Parry Fjord, Almirantazgo Sound (Cuevas)	XII	Ice	Good	-	-	TF-23	This study
248	Y	-	2023-12-17	Est. from Loc.	-54.685	-69.42	Adult	F	Parry Fjord, Almirantazgo Sound (Cuevas)	XII	Ice	Good	-	-	TF-23	This study
249	Y	-	2023-12-17	Est. from Loc.	-54.685	-69.42	Adult	F	Parry Fjord, Almirantazgo Sound (Cuevas)	XII	Ice	Good	-	-	TF-23	This study
250	Y	-	2023-12-17	Est. from Loc.	-54.685	-69.42	Adult	F	Parry Fjord, Almirantazgo Sound (Cuevas)	XII	Ice	Good	-	-	TF-23	This study
132	Y	TF01	2023-12-18	Est. from Loc.	-54.62	-69.36	Adult	F	Parry Fjord, Almirantazgo Sound	XII	Ice	Good	-	-	TF-23	TF Catalog, This study
250	Y	-	2023-12-18	Est. from Loc.	-54.62	-69.36	Adult	F	Parry Fjord, Almirantazgo Sound	XII	Ice	Good	-	-	TF-23	This study
249	Y	-	2023-12-18	Est. from Loc.	-54.62	-69.36	Adult	F	Parry Fjord, Almirantazgo Sound	XII	Ice	Good	-	-	TF-23	This study
180	Y	TF14	2023-12-18	Est. from Loc.	-54.62	-69.36	Adult	F	Parry Fjord, Almirantazgo Sound	XII	Ice	Good	-	Identified from TF Catalog. Animal molting	TF-23	TF Catalog, This study
*Only Scientific references and catalogs are provided in the References Tab.
** Citation not reported by the original source

## Sheet: References
Scientific References of Supplementary Table 2
Aguayo-Lobo, A., Acevedo, J., Brito, J. L., Acuña, G. P., Bassoi, M., Secchi, E. R., et al. (2011). Presence of the leopard seal, hydrurga leptonyx (de blainville, 1820), on the coast of chile: An example of the antarctica-South America connection in the marine environment. Oecologia Australis 15(1), 69-85.
Acevedo, J., and Martinez, F. (2013). Residence of the leopard seal in the magellan strait: A potential sub-antarctic population inhabiting the waters of southern chile? Polar biology 36, 453–456.
Acevedo, J., González, A., Garthe, S., González, I., Gómez, R., and Aguayo-Lobo, A. (2017). Births of leopard seals hydrurga leptonyx in southern chile. Polar Biology 40, 713–717.
Cursach, J. A., Rau, J. R., Ojeda, J., Vilugrón, J., Tobar, C., Oyarzún, C., et al. (2011). Diversidad de aves y mamı́feros marinos en bahı́a san Pedro, costa de Purranque, centro-sur de chile. Gayana (Concepción) 75, 146–154.
Haeussermann, V., Foersterra, G., & Plotnek, E. (2012). Sightings of marine mammals and birds in the Comau Fjord, Northern Patagonia, between 2003 and mid 2012. Spixiana 35(2), 247-262.
Housse, R. (1953). Los mamíferos de Chile, su vida y sus costumbres; Ed. Univ. de Chile. Santiago, 159 pp.
Hucke-Gaete, R., Aguayo-Lobo, A., Yancovic-Pakarati, S., and Flores, M. (2014). Marine mammals of easter island (Rapa Nui) and salas y Gómez island (motu motiro hiva), Chile: A review and new records. Latin American Journal of Aquatic Research 42, 743–751.
Markham, B.J. (1971). Observation on the elephant seal and the leopard seal seals on Brecknock Peninsula (Alberto M. de Agostini National Park). Tierra del Fuego. Anales Instituto de la Patagonia 2, 160-163.
Oliver-Schneider, C. (1946). Catálogo de los mamíferos de Concepción. Boletín de la Sociedad de Biología, Concepción (Chile) 21, 67-83.
Scheffer, F. (1978). Presencia de un leopardo marino en la playa de Guanaqueros, 12 agosto, Coquimbo, Chile. Condor, 41: 23-29.
Sieldfeld, W. (1978). Algunas consideraciones sobre fócidos (Pinnipedia) asociados a las costas de Chile. Anales Instituto de la Patagonia 9, 153-156.
SR Catalog: Fernández-Ferrada N., Gómez, G., and Toledo R. 2021. Catálogo de foto-identificación de focas leopardo (Hydrurga leptonyx) San Rafael Lagoon National Park. Eds: Corporación Nacional Forestal (CONAF), Región de Aysén. 42pp.
Stewart, B. S., Grove, J. S., Kühlem, A., and Flores, M. (2020). Recent and historic occurrences of leopard seals (Hydrurga leptonyx) at easter island (Rapa Nui), Eastern Polynesia. Polar Biology 43, 1899–1902.
TF Catalog: Borras-Chavez R., Martínez F., Brown N., Moreno Azua F., Dougnac C., Arredondo C., Ibarra Ríos M.F. & Kienle S. (2024). Leopard Seals of Tierra del Fuego: Graphic and Scientific Photo Identification Field Guide. 27 pp.
Torres, D., Aguayo-Lobo, A. (1971). Algunas observaciones sobre la fauna del archipiélago de Juan Fernández. Boletín de la Universidad de Chile 2(212), 26-37.
Torres, D., Yañez, J., and Catán, P. (1979). Mamíferos Marinos de Chile. Antecedentes y Situación Actual. Biología Pesquera (Chile) 11, 49-81.
van der Linde, K., Visser, I. N., Bout, R., Krause, D. J., Forcada, J., Siniff, D., et al. (2022). A review of leopard seal (Hydrurga leptonyx) births and pups using a standardised age-class classification system. Polar Biology 45, 1193–1209.
Yañez, A.P. (1948). Vertebrados Marinos Chilenos. Revista de Biología Marina 1(2), 103-123.
Zuñiga, P. and Brito, J.L. (1997). Presencia de Hydrurga leptonyx en la costa continental de Chile Central. In: VII Congreso Interamericano de Biodiversidad y Zoología de Vertebrados. Universidad de Concepción. Chile. 154p.
Kienle, S. S., Bonin, C. A., Gómez, G., Goebel, M. E., Donke, M., Sperou, E. S., ... & Borras-Chavez, R. (2024). First paired observations of sexual behavior and calls in wild leopard seals. Polar Biology, 47(10), 1025-1037.
